# Supplementary material
Source: PubMed Central journal article supplement (PMC4703095)
Supplement: NIHMS737187-supplement-suppl_data.pdf [file NIHMS737187-supplement-suppl_data.pdf]

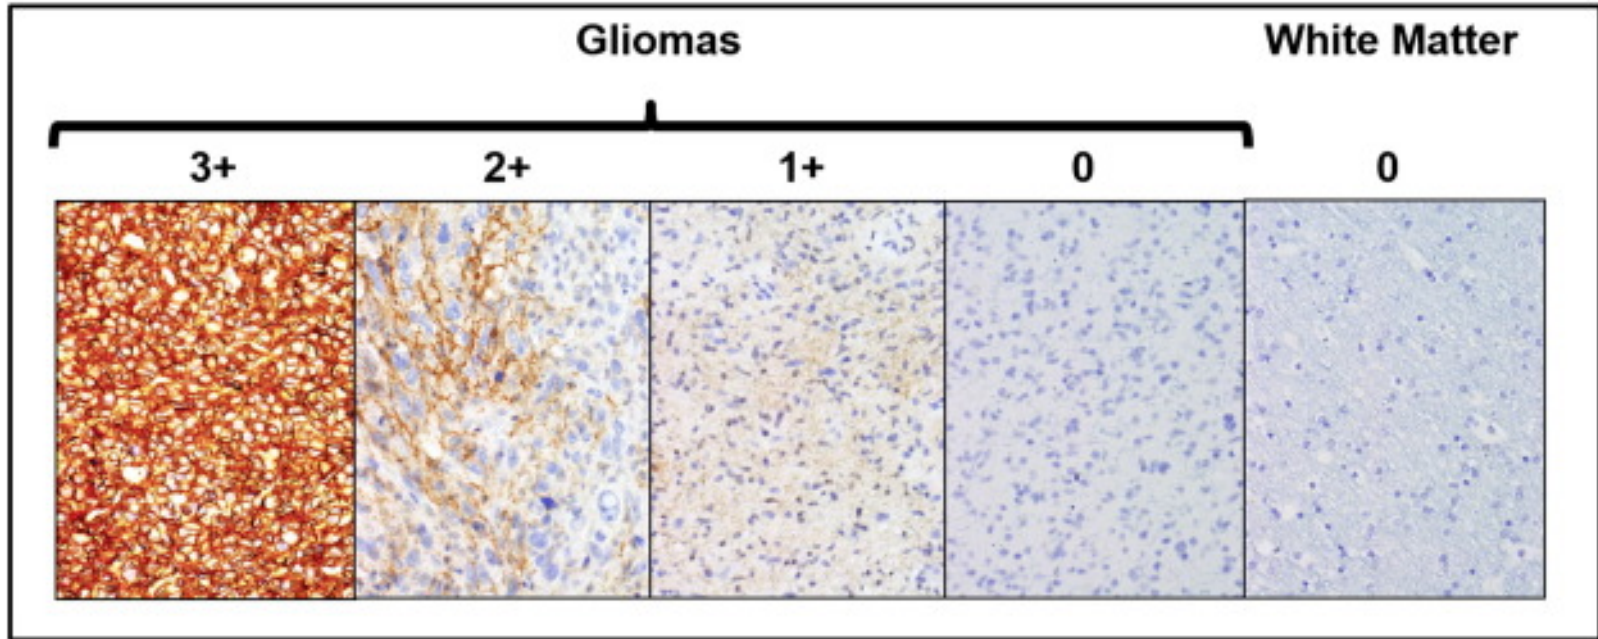

Supplementary Fig. 1. Extent of podoplanin expression in diffuse gliomas. Scoring of podoplanin immunostaining was performed on a four tiered qualitative scale based on staining intensity, ranging from negative (0) to strongly positive (3+). Non-neoplastic gra...

M. Adelita Vizcaíno, Smit Shah, Charles G. Eberhart, Fausto J. Rodriguez

**Clinicopathologic implications of NF1 gene alterations in diffuse gliomas ☆**

Human Pathology, Volume 46, Issue 9, 2015, 1323–1330

<http://dx.doi.org/10.1016/j.humpath.2015.05.014>
